# Supplementary material for: Study on the behavior and mechanism of NiFe-LDHs used for the degradation of tetracycline in the photo-Fenton process
Source: Royal Society of Chemistry journal article supplement (doi:10.1039/d3ra05475f), 2023-01-01
Supplement: d3ra05475f1.pdf [file d3ra05475f1.pdf]

## Supplementary Information

1

2

### 3 **Characterization of NiFe-LDHs**

4 X-ray diffraction (XRD) measurements were conducted to explore the crystallinity  
5 and phase composition of as-prepared samples on a Rigaku D/MAX-2550  
6 diffractometer using Cu-K $\alpha$  radiation ( $\lambda = 0.15418$  nm). The morphology and size of  
7 3D NiFe-LDHs were examined by field emission scanning electron microscope  
8 (FESEM/EDS, ZEISS Ultra Plus) using an accelerating voltage of 15 kV. X-ray  
9 photoelectron spectroscopic (XPS) measurement of 3D NiFe-LDHs was performed by  
10 VG Multilab 2000 to examine the elemental composition and chemical state. The FT-  
11 IR measurements were using the AVATAR 360 spectrometer (Nicolet instrument  
12 Corporation, America) in the region 4000-500  $\text{cm}^{-1}$ . All binding energies were  
13 calibrated with the saturated hydrocarbon C 1s peak at 284.5 eV. The specific surface  
14 area was tested by the Brunauer-Emmett-Teller (BET) model. The active species were  
15 certified by using an Electron Spin Resonance (ESR, Bruker A200). LC/MS/MS  
16 (Agilent1100HPLC-tandem an Agilent 6410 Triple Quadruple mass spec-trometer  
17 (MS/MS)) was employed to detect the degradation intermediates derived from TC.  
18 Electrochemical tests were performed at an electrochemical workstation (CHI 660E,  
19 CH Instruments Inc, Shanghai, China) using Na<sub>2</sub>SO<sub>4</sub> (0.1 M) as an electrolyte and a  
20 three-electrode system (working electrode: CC/NiFe-LDHs material; opposite  
21 electrode: carbon rod, reference electrode: Hg/HgO electrode).

### 22 **H<sub>2</sub>O<sub>2</sub> decomposition**

23 The iodometric method was used to test H<sub>2</sub>O<sub>2</sub>. Fluorescence reagents (0.1  
24 M potassium hydrogen phthalate and 0.4 M potassium iodide aqueous solution)  
25 were typically complexed with the reaction system in a specific volume. The  
26 H<sub>2</sub>O<sub>2</sub> concentration was determined during each reaction phase by measuring th  
27 e absorbance at 220 nm with a UV-Vis spectrophotometer. The H<sub>2</sub>O<sub>2</sub> breakdo  
28 wn tests were carried out in an ·O<sub>2</sub><sup>-</sup> saturated, visible light-irradiated environme  
29 nt. In the Quartz tube, 30 mg of catalyst was suspended in 50 mL of H<sub>2</sub>O<sub>2</sub> a

30 queous solution (10 mM). The apparatus was then exposed to visible light for  
31 90 minutes before measuring the remaining H<sub>2</sub>O<sub>2</sub> concentration.

### 32 **Cyclic experiment**

33 Using xenon lamp to simulate sunlight as a light source, add 30 mg catalyst into a  
34 beaker containing 50 mL 30 mg/L tetracycline solution, place the beaker in a magnetic  
35 stirrer and stir for 30 min to reach adsorption equilibrium, turn on the light source, add  
36 the corresponding amount of H<sub>2</sub>O<sub>2</sub> to start the degradation experiment and time. The 3  
37 mL samples were taken from the beaker at a specific time point, filtered by 0.22 μ m  
38 filter membrane, and the absorbance was measured by ultraviolet spectrophotometer.  
39 After the reaction, the corresponding volume of tetracycline was added to the beaker  
40 and mixed evenly, so that the concentration of the TC in the beaker was maintained at  
41 30 mg/L, and then H<sub>2</sub>O<sub>2</sub> was added to the solution to start the degradation experiment,  
42 which was repeated for six times. Each group of experiments was carried out three  
43 times to ensure the accuracy of experimental data.

### 44 **Methods for analysis of Ni and Fe content**

45 In this study, the contents of Ni and Fe in the reaction solution and on NiFe-LDHs  
46 were measured by Inductively Coupled Plasma Optical Emission Spectrometer, ICP-  
47 OES 167nm-785nm/725 Agilent, USA) determination The solid catalyst was dissolved  
48 with aqua regia, the pH was adjusted to 5-7 after complete dissolution, and the volume  
49 was finally fixed to 50 mL for analysis. The accuracy and precision were controlled by  
50 blank and parallel samples. The relative deviation of Ni and Fe in parallel samples was  
51 within 16%~3.4%, and the results of blank samples were lower than the lower limit of  
52 detection.

53

54

55

56

57

58

59

60

61

62

**Table S1** Molecular information of TC, OTC and FT

| antibiotic | Formula              | Structure                                                                         | Molecular weight | UV, $\lambda_{\max}$ (nm) |
|------------|----------------------|-----------------------------------------------------------------------------------|------------------|---------------------------|
| TC         | $C_{22}H_{24}N_2O_8$ | 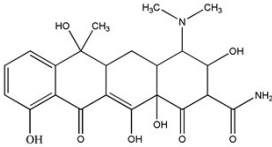 | 444.45           | 365                       |
| OTC        | $C_{22}H_{24}O_9N_2$ |  | 460.434          | 355                       |
| FT         | $C_8H_6N_4O_5$       |  | 238.16           | 367                       |

63

64

**Table S2** Water sample data of FAW

| Sewage type                | Source of sewage              | Sewage flow rate     | Major pollutant                                                                                | COD       |
|----------------------------|-------------------------------|----------------------|------------------------------------------------------------------------------------------------|-----------|
| Electrophoretic wastewater | Automobile coating technology | 14 m <sup>3</sup> /h | Polymer resins, emulsified oils, surfactants, PO <sub>4</sub> <sup>3-</sup> , Pb <sup>2+</sup> | 2300 mg/L |

65

66

**Table S3** Intermediate products of TC-HCl degradation

| m/z | Molecular formula    | Structural formula                                                                    |
|-----|----------------------|---------------------------------------------------------------------------------------|
| 445 | $C_{22}H_{24}O_8N_2$ | 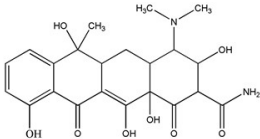 |
| 415 | $C_{21}H_{22}O_8N_2$ |  |
| 401 | $C_{21}H_{22}O_8N_2$ |  |

|     |                      |                                                                                       |
|-----|----------------------|---------------------------------------------------------------------------------------|
| 366 | $C_{20}H_{20}O_8N_2$ | 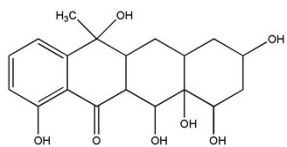   |
| 353 | $C_{20}H_{19}O_7N_2$ |    |
| 274 | $C_{20}H_{21}O_7N$   |    |
| 262 | $C_{18}H_{21}O_6N$   |    |
| 246 | $C_{17}H_{19}O_5$    |   |
| 221 | $C_9H_{10}O_2$       |  |
| 218 | $C_5H_{10}O_3$       |  |
| 135 | $C_3H_4O_3$          |  |
| 123 | $C_3H_4O_2$          |  |
| 85  | $C_3H_4O$            |  |

69 **Table S4** Content changes of nickel ion and iron ion before and after the reaction

| Samples         | Relative ratio   |                  |                  |                  |
|-----------------|------------------|------------------|------------------|------------------|
|                 | Ni 2p            |                  | Fe 2p            |                  |
|                 | Ni <sup>2+</sup> | Ni <sup>3+</sup> | Fe <sup>2+</sup> | Fe <sup>3+</sup> |
| Fresh NiFe-LDHs | 24.9%            | 75.1%            | 50.1%            | 49.9%            |
| Used NiFe-LDHs  | 37.85%           | 62.15%           | 31.99%           | 68.01%           |

70

71 **Table S5** Repeated use of metal ion leaching by catalysts

| Samples         | Ion leaching |       |
|-----------------|--------------|-------|
|                 | Ni           | Fe    |
| Fresh NiFe-LDHs | 6.55         | 10.21 |
| Used NiFe-LDHs  | 3.92         | 3.14  |

72

73

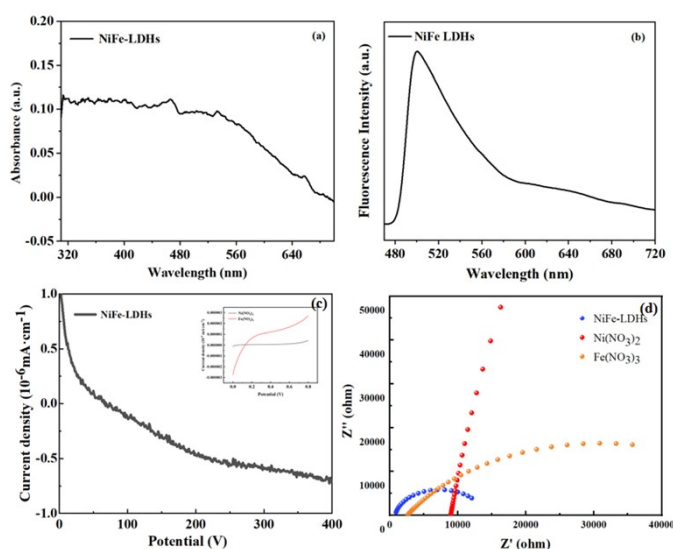

74

75

**Fig. S1** (a-d) UV-vis, PL, LSV and EIS of NiFe-LDHs

76

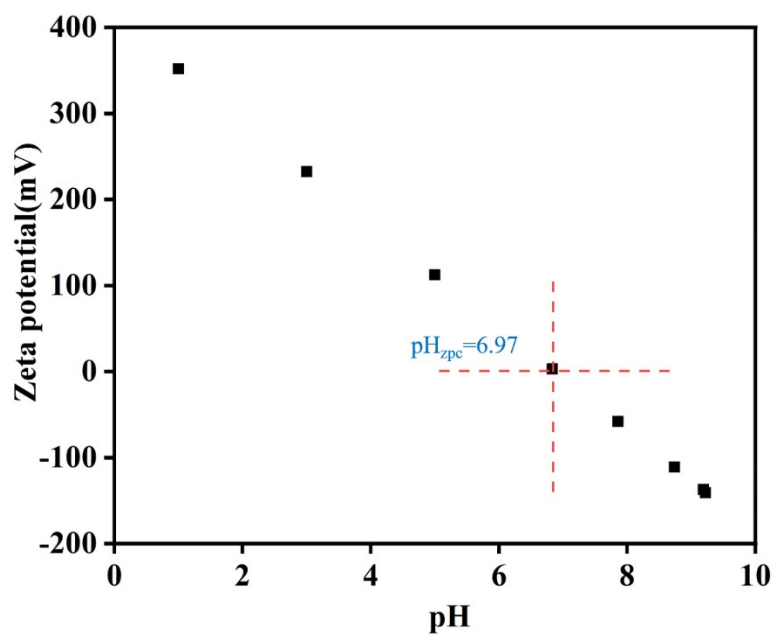

77

78

Fig. S2 Isoelectric point of NiFe-LDHs

79

80

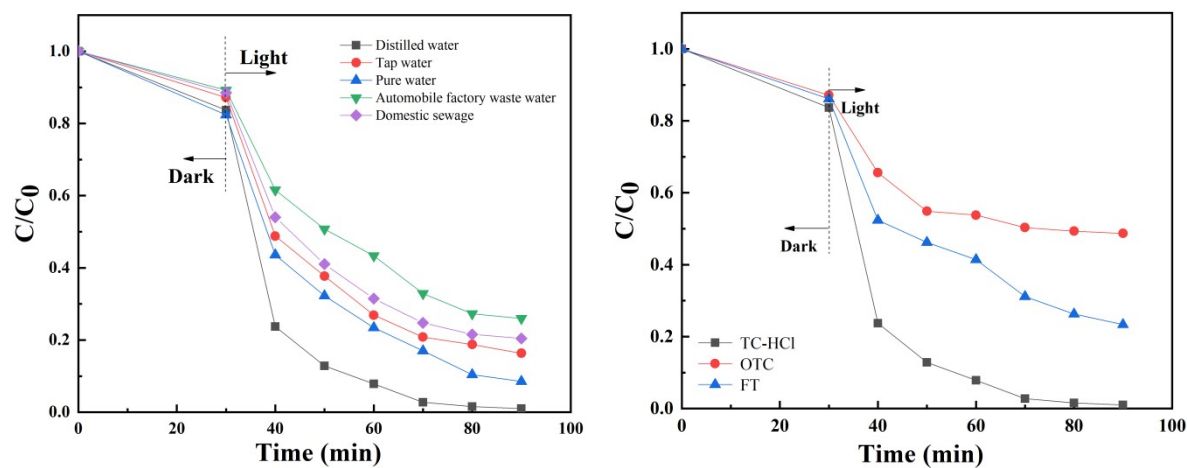

81

82

Fig. S3 Effects of different water quality on degradation rate

83

Degradation of other types of antibiotics by NiFe-LDHs

84

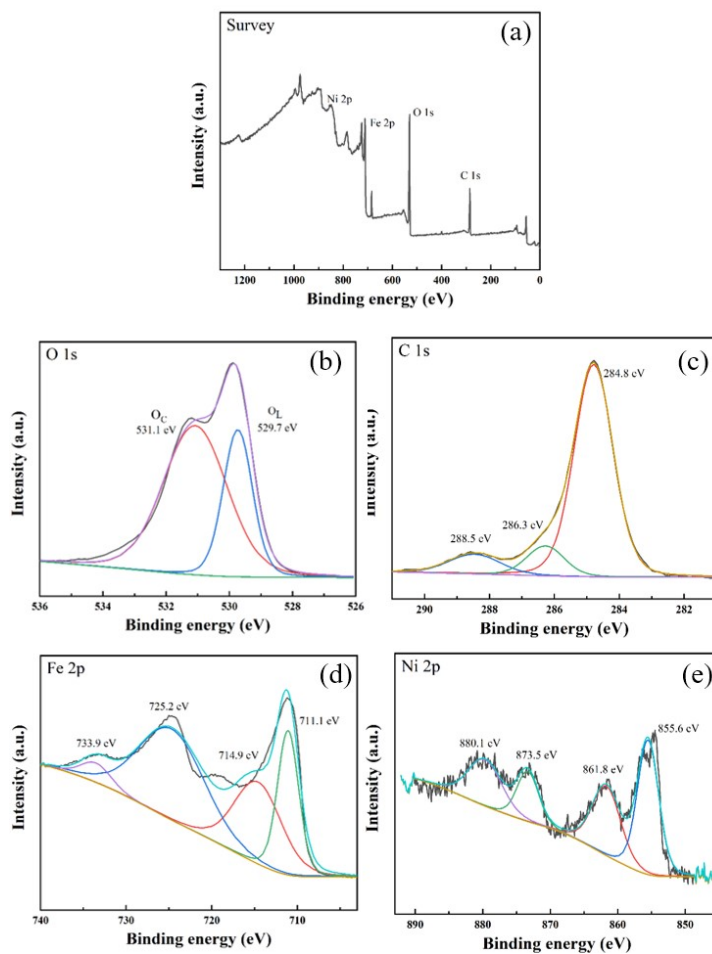

85

86

**Fig. S4** XPS diagram of NiFe-LDHs after four cycles of experiment

87

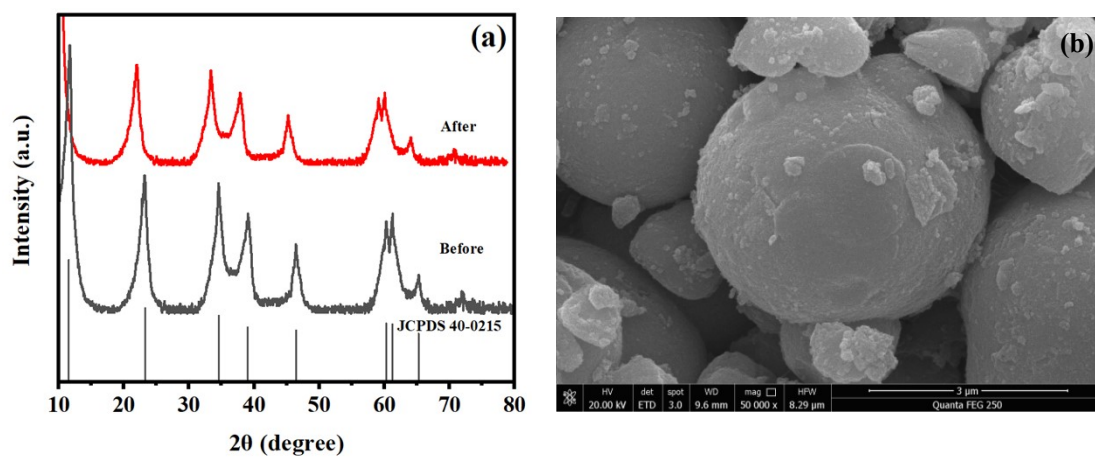

88

89

**Fig. S5** (a)XRD and (b)SEM of NiFe-LDHs after six cycles

90

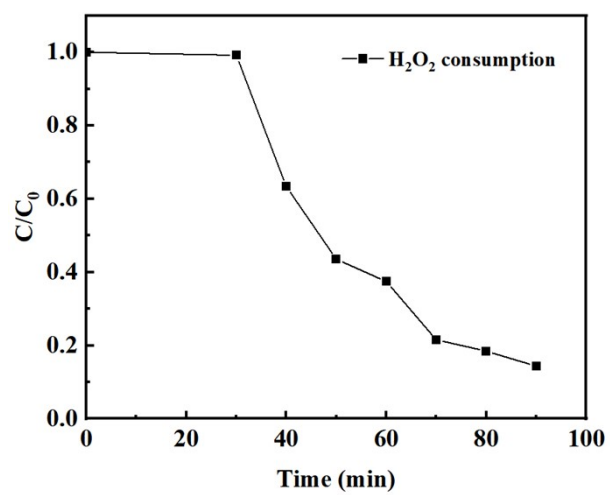

91

92

**Fig. S6** Decomposition of H<sub>2</sub>O<sub>2</sub> in different reaction systems.
